# Supplementary material
Source: PubMed Central journal article supplement (PMC4704189)
Supplement: AAC.00919-15_zac001164693so1.pdf [file AAC.00919-15_zac001164693so1.pdf]

## Supplemental material

### Supplemental Figure S1 to S6, Table S1 and S2

#### Molecule Targeting Glucosyltransferase Inhibits *Streptococcus mutans* Biofilm Formation and Virulence

Zhi Ren<sup>a</sup>, Tao Cui<sup>b</sup>, Jumei Zeng<sup>c</sup>, Lulu Chen<sup>a</sup>, Wenling Zhang<sup>a</sup>, Xin Xu<sup>a</sup>, Lei Cheng<sup>a</sup>,  
Mingyun Li<sup>a</sup>, Jiyao Li<sup>a</sup>, Xuedong Zhou<sup>a</sup>, Yuqing Li<sup>a#</sup>

<sup>a</sup> State Key Laboratory of Oral Diseases, West China Hospital of Stomatology, Sichuan University, Chengdu, PR China. <sup>b</sup> State Key Laboratory of Agricultural Microbiology, Center for Proteomics Research, College of Life Science and Technology, Huazhong Agricultural University, Wuhan, PR China. <sup>c</sup> Department of Structural Biology, Key Laboratory of Applied and Environmental Microbiology, Chengdu Institute of Biology, Chinese Academy of Sciences, Chengdu, PR China.

Running Head: Molecule Targeting GTF Inhibits *S. mutans* Biofilm.

# Address correspondence to Yuqing Li, [liyuqing@scu.edu.cn](mailto:liyuqing@scu.edu.cn).

Z.R. and T.C. contributed equally to this work.

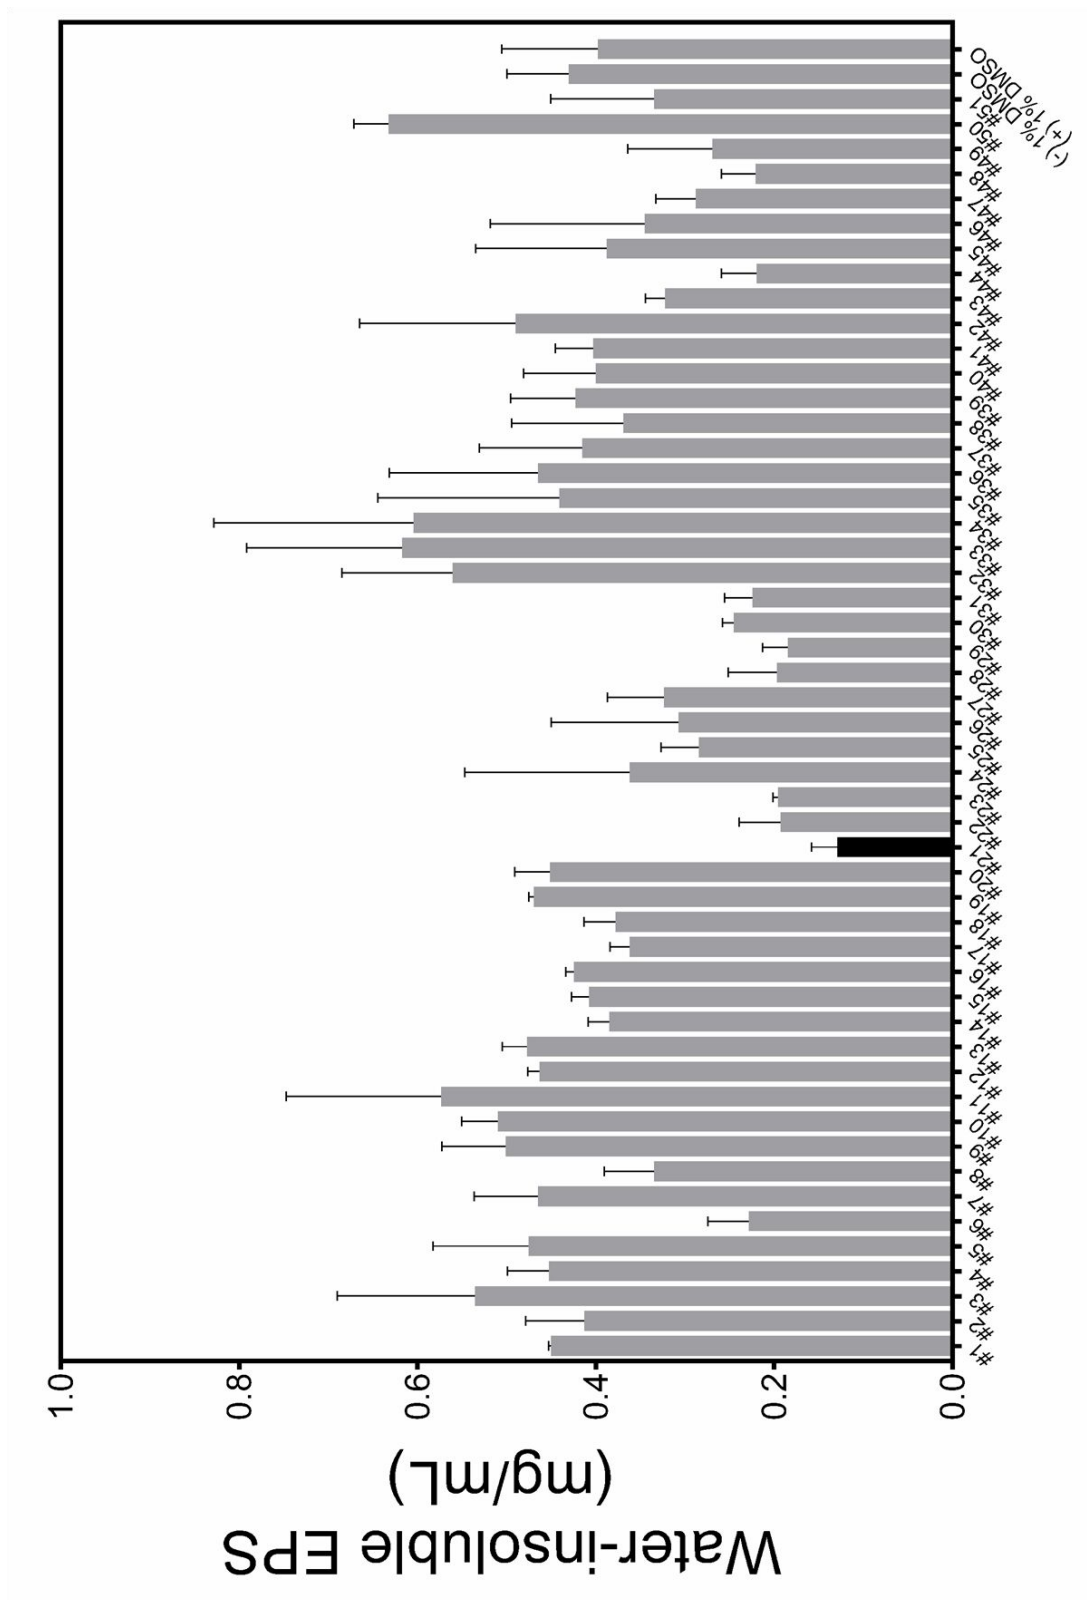

**Figure S1.** Effect of the 51 lead compounds on the synthesis of water-insoluble polysaccharide in *S. mutans* biofilms determined by anthrone-sulfuric method.

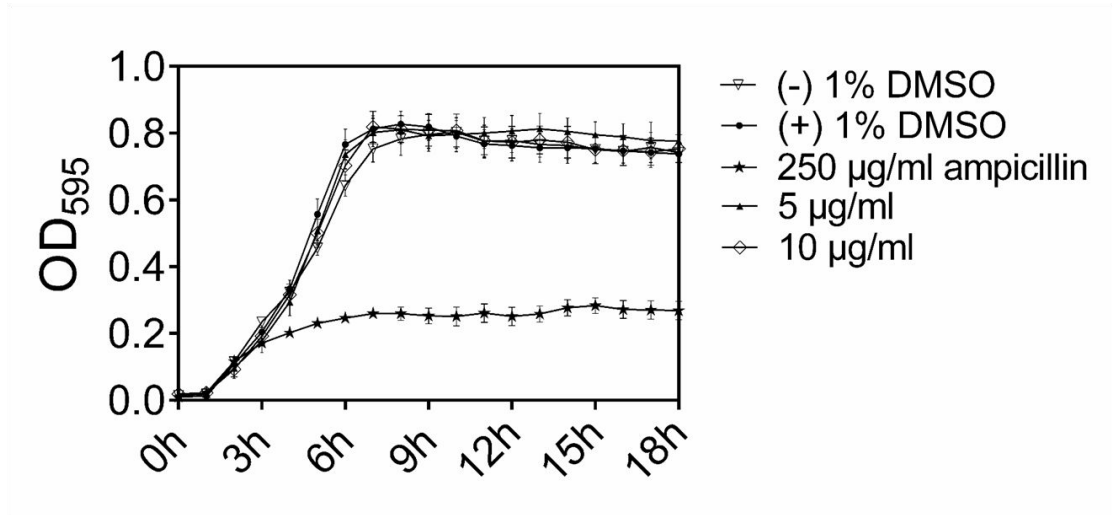

Figure S2. Effect of treatments on growth kinetics of planktonic *S. mutans* UA159.

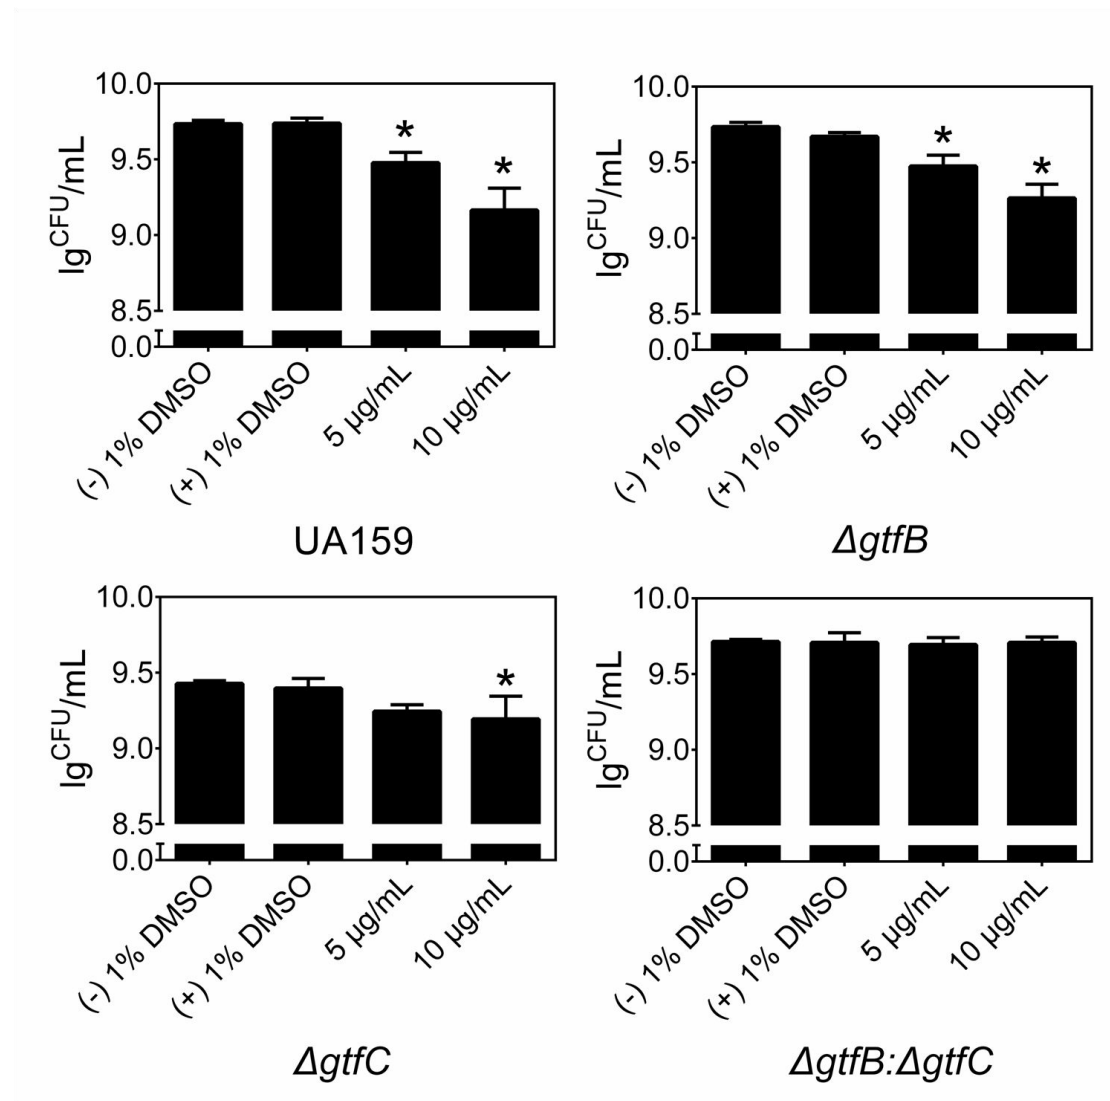

**Figure S3.** Effect of the compound on biofilms of *S. mutans* UA159 and the *gtf* mutants by determination of average number of CFU recovered per biofilm.

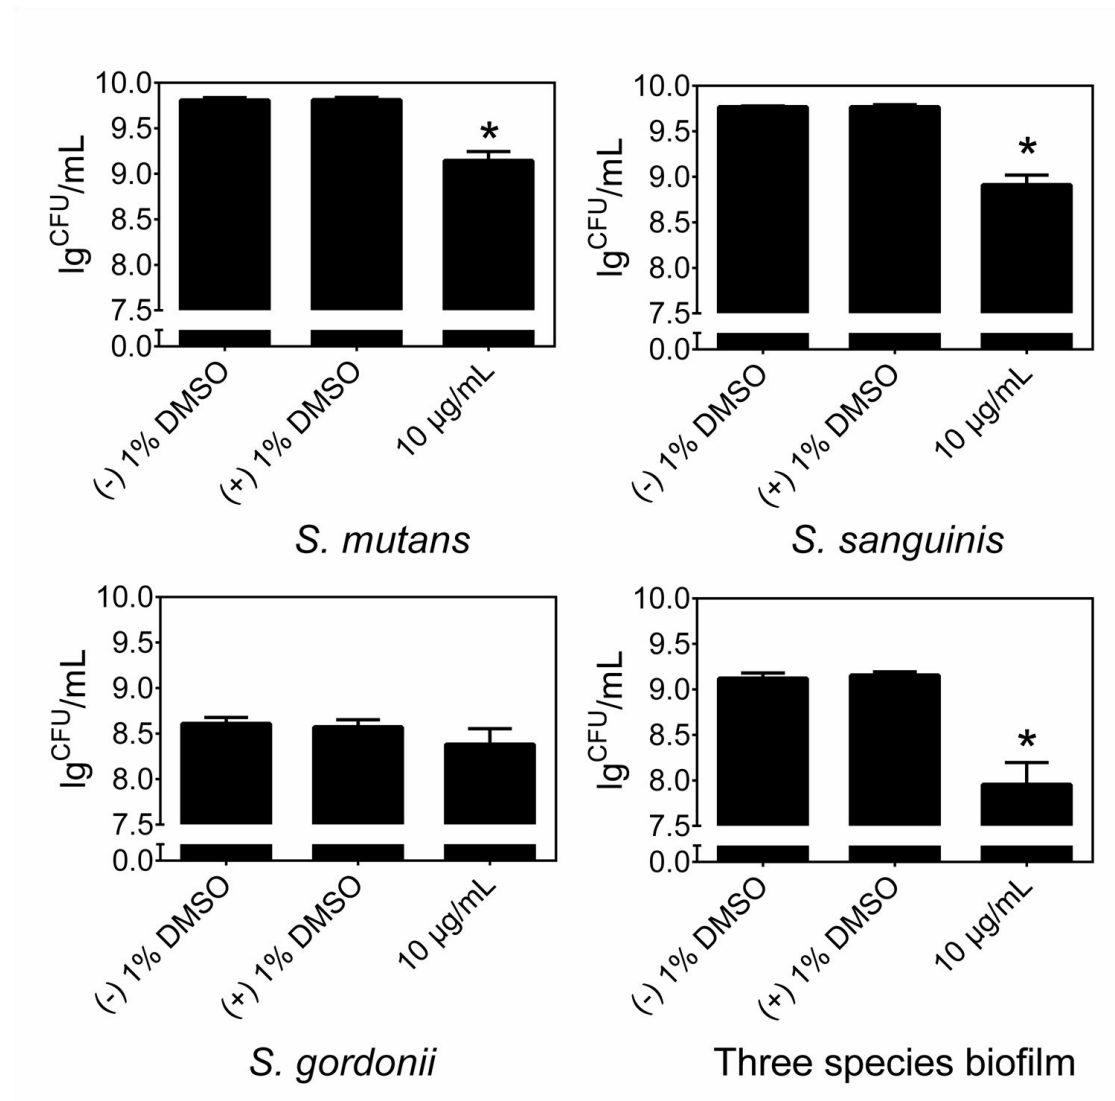

**Figure S4.** Effect of the compound on biofilm formation by *S. mutans*, *S. sanguinis*, *S. gordonii* or on multispecies biofilms.

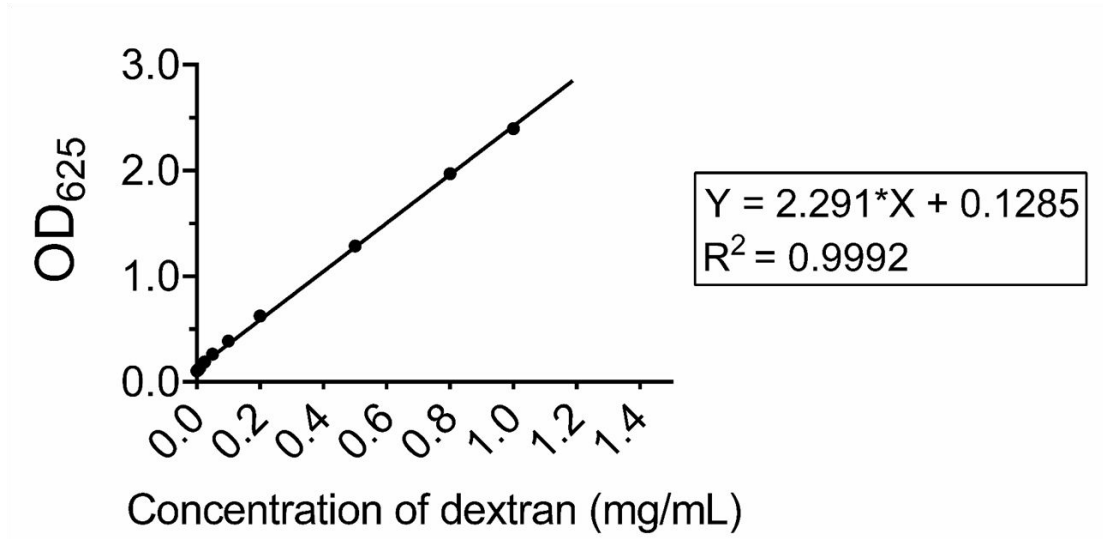

**Figure S5.** Standard curve for quantitative determination of water-insoluble extracellular polysaccharides by anthrone-sulfuric method.

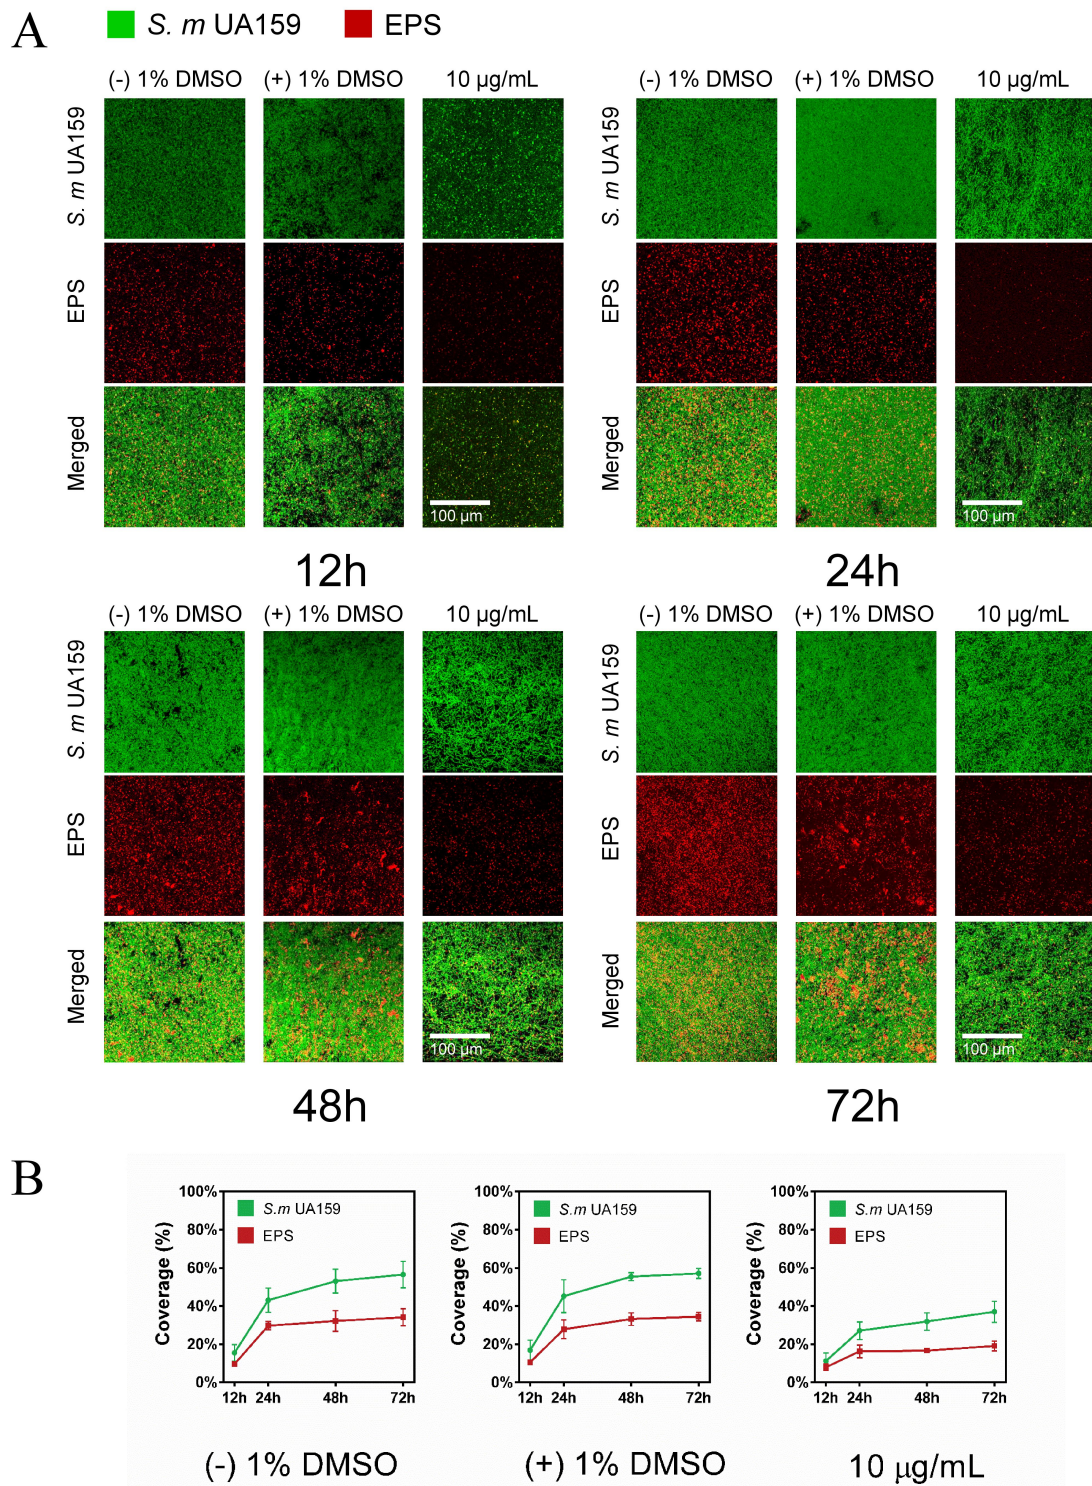

**Figure S6.** Effect of the compound on the *S. mutans* biofilms at different time points after treatments.

(A) Fluorescence images of bacteria (green) and EPS (red) of *S. mutans* biofilms formed on the surface of glass coverslip taken at  $\times 60$  magnification.

(B) Quantitative analysis of the distribution of bacteria and EPS at different points of time.

Values represent the means  $\pm$  standard deviations from three independent experiments.

\*, Significant difference compared with the untreated control ( $P < 0.05$ ).



**Table S1.** Primers used for quantitative RT-PCR assays in this study.

| <b>Primers</b>              | <b>Nucleotide Sequence (5'-3')</b> | <b>Reference</b> |
|-----------------------------|------------------------------------|------------------|
| <i>S. mutans</i> 16S rRNA-f | AGCGTTGTCCGGATTTATTG               | (11)             |
| <i>S. mutans</i> 16S rRNA-r | CTACGCATTTACCGCTACA                |                  |
| <i>gtfB</i> -f              | CACTATCGGCGGTTACGAAT               |                  |
| <i>gtfB</i> -r              | CAATTTGGAGCAAGTCAGCA               |                  |
| <i>gtfC</i> -f              | GATGCTGCAAACCTTCGAACA              |                  |
| <i>gtfC</i> -r              | TATTGACGCTGCGTTTCTTG               |                  |
| <i>gtfD</i> -f              | TTGACGGTGTTTCGTGTTGAT              |                  |
| <i>gtfD</i> -r              | AAAGCGATAGGCGCAGTTTA               |                  |

**Table S2.** Bacterial strains used in this study.

| <b>Strains</b>                                               | <b>Description</b>                    | <b>Source or reference</b>                                           |
|--------------------------------------------------------------|---------------------------------------|----------------------------------------------------------------------|
| <i>S. mutans</i> UA159                                       | Genomic type strain                   | ATCC                                                                 |
| <i>S. mutans</i> $\Delta$ <i>gtfB</i>                        | <i>gtfB</i> mutant strain             | kindly provided by Robert A. Burne                                   |
| <i>S. mutans</i> $\Delta$ <i>gtfC</i>                        | <i>gtfC</i> mutant strain             | (Department of Oral Biology, University of Florida, Gainesville, FL) |
| <i>S. mutans</i> $\Delta$ <i>gtfB</i> : $\Delta$ <i>gtfC</i> | <i>gtfB gtfC</i> double-mutant strain |                                                                      |
